# Supplementary material
Source: PubMed Central journal article supplement (PMC8274608)

**Supplemental Figure 1. Analysis of innate immune cells and T cells in the lungs**

**of vaccinated mice.** (A) Gating strategy for innate immune cell subsets in lung. Groups of C57BL/6 mice were vaccinated with DQ-OVA protein (20ug) formulated in ADJ (5%) + GLA (5ug). At days 2, 5 and 8 after vaccination, lung cells were stained with anti-CD11b, anti-Siglec-F, anti-CD11c, anti-CD64, anti-Ly6G, anti-Ly6C, anti-CD103, and anti-I-A/I-E. Cells were immunophenotyped using the following parameters: neutrophils (Ly-6G<sup>HI</sup>/Siglec-F<sup>LO</sup>/CD64<sup>LO</sup>), alveolar macrophages Ly6G<sup>LO</sup>/Siglec-F<sup>HI</sup>/CD64<sup>HI</sup>CD103<sup>LO</sup>), monocytes (Ly6G<sup>LO</sup>/Siglec-F<sup>LO</sup>/MHC-II<sup>LO</sup>/CD11c<sup>LO</sup>/CD64<sup>LO</sup>/CD103<sup>LO</sup>CD11b<sup>H</sup>/Ly6C<sup>HI</sup>), monocyte-derived DCs (Ly6G<sup>LO</sup>/Siglec-F<sup>LO</sup>MHC-II/CD11c<sup>HI</sup>/CD64<sup>HI</sup>/CD103<sup>LO</sup>/CD11b<sup>HI</sup>/Ly6C<sup>LO-INT</sup>, and CD103<sup>+ve</sup> migratory DCs (Ly6G<sup>LO</sup>/Siglec-F<sup>LO</sup>/CD64<sup>LO</sup>/MHC-II/CD11c<sup>HI</sup>/CD103<sup>HI</sup>/CD11b<sup>LO</sup>). (B) Gating strategy for visualization and analysis of antigen-specific T cells: FSC vs. SSC for lymphocyte gate → singlets → live-cell gate → CD4 or CD8 T cells.

**A.**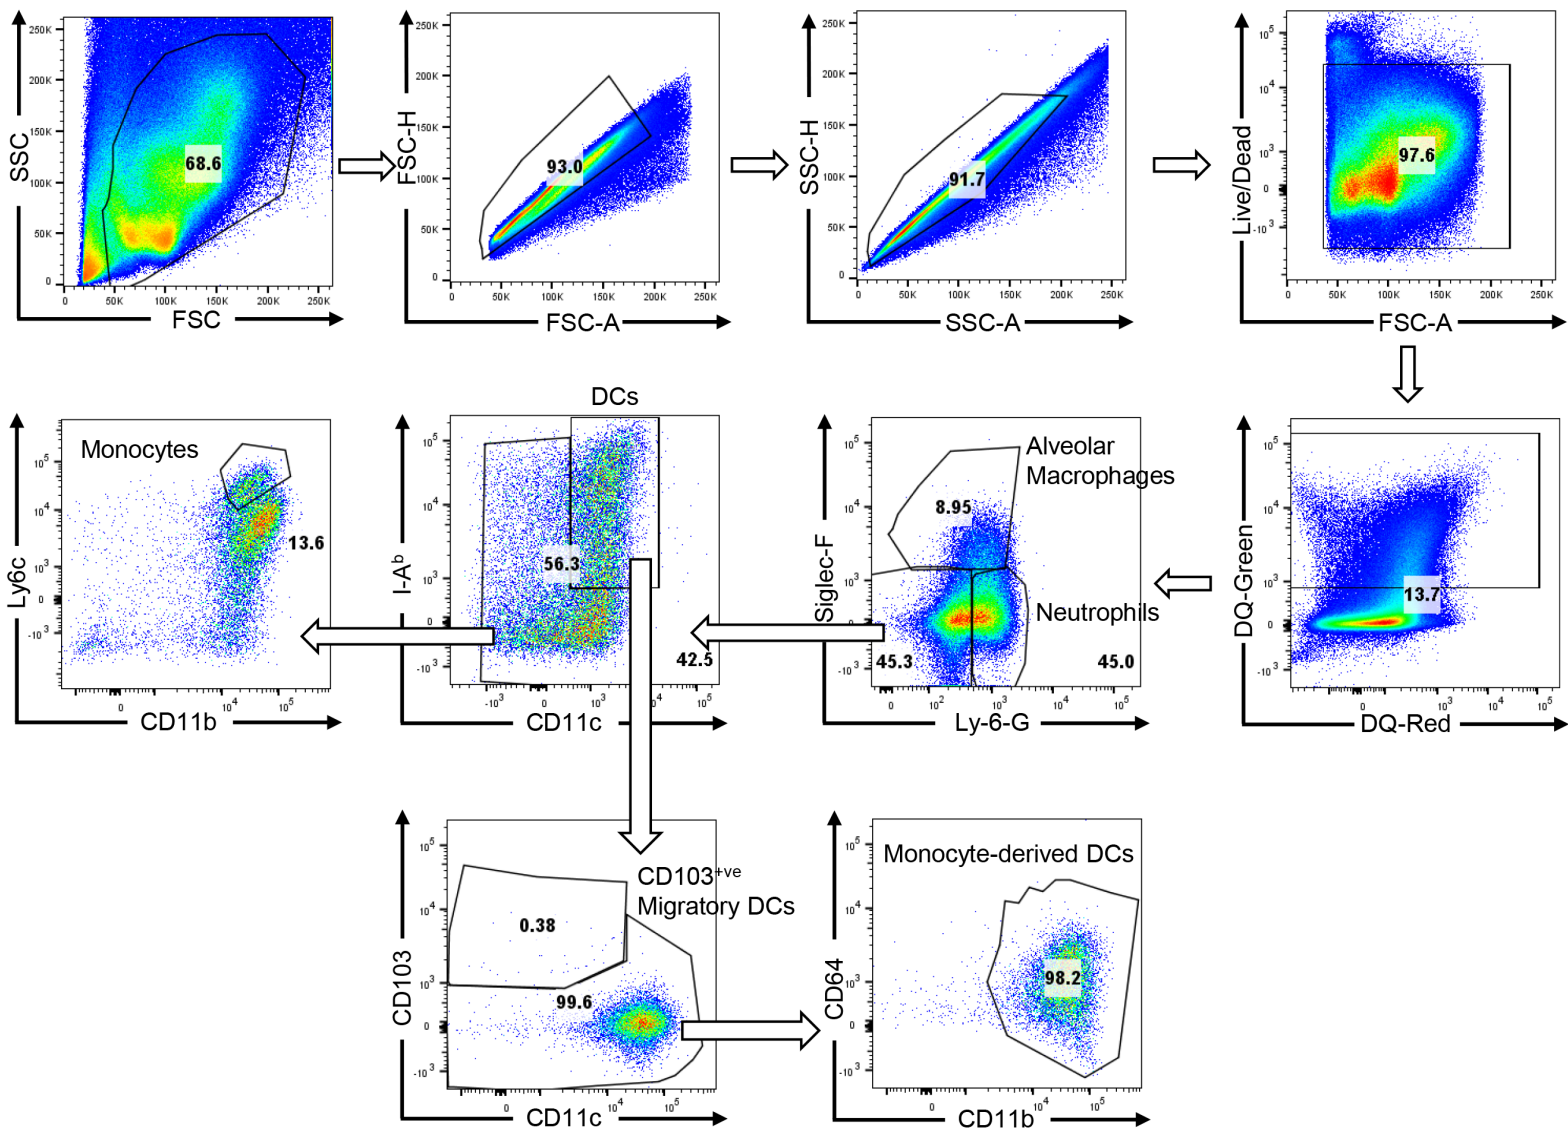**B.**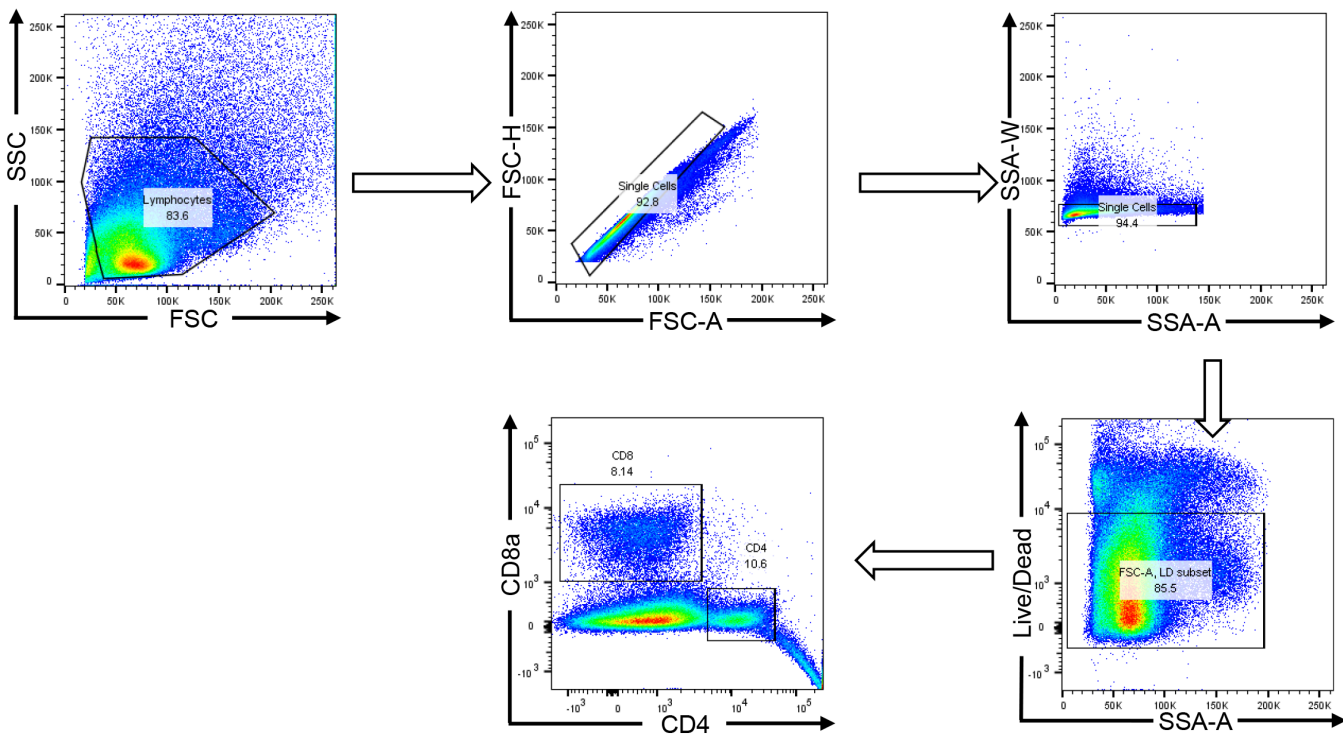

Supplement: jvi.00530-21-s0001.pdf [file jvi.00530-21-s0001.pdf]
